# Supplementary material
Source: PubMed Central journal article supplement (PMC8053996)
Supplement: pnas.2019208118.sapp.pdf [file pnas.2019208118.sapp.pdf]

1

## 2 **Supplementary Information for**

### 3 **Dead clades walking are a pervasive macroevolutionary pattern**

4 **B. Davis Barnes, Judith A. Sclafani and Andrew Zaffos**

5 **B. Davis Barnes.**

6 **E-mail: [bdavisbarnes@psu.edu](mailto:bdavisbarnes@psu.edu)**

#### 7 **This PDF file includes:**

8 Figs. S1 to S5 (not allowed for Brief Reports)

9 Tables S1 to S4 (not allowed for Brief Reports)

10 SI References

12 **Comparative DCW identification through Shareholders Quorum Subsampling standardization.** Diversity metrics were calcu-  
13 lated as the number of unique genera occurring within each stage (in-bin genus richness), standardized using the Shareholder  
14 Quorum Subsampling method (SQS; (1, 2)). This approach corrects for samples and stages in which fossil genera have uneven  
15 abundances, which could distort diversity estimates, by subsampling to achieve the same relative coverage (e.g., (3, 4)). SQS  
16 calculations were performed using S. M. Holland's R code ([strata.uga.edu/8370/rtips/shareholderQuorumSubsampling.html](http://strata.uga.edu/8370/rtips/shareholderQuorumSubsampling.html)),  
17 with quorum = 0.75, i.e. the highest coverage value which still permits the standardization of all orders. Theoretically, shifting  
18 the quorum value should not degrade the relative diversity trends through time so long as the value is maintained in all analyses  
19 (4). Each occurrence was then assigned to stage bins based on their "max\_ma" and "min\_ma" age fields in the PBDB. First  
20 and last appearance data (FAD/LAD) for genera were then calculated from the lower and upper ages of their stage bins,  
21 respectively. Genera were not assumed to range-through, i.e. be present in every stage between their FAD and LAD without a  
22 genus occurrence in the PBDB, when calculating the SQS-standardized genus richness.

23 All other methods were conducted identically to the main text. The SQS-genus richness identified DCWs are featured in  
24 Fig. S4.

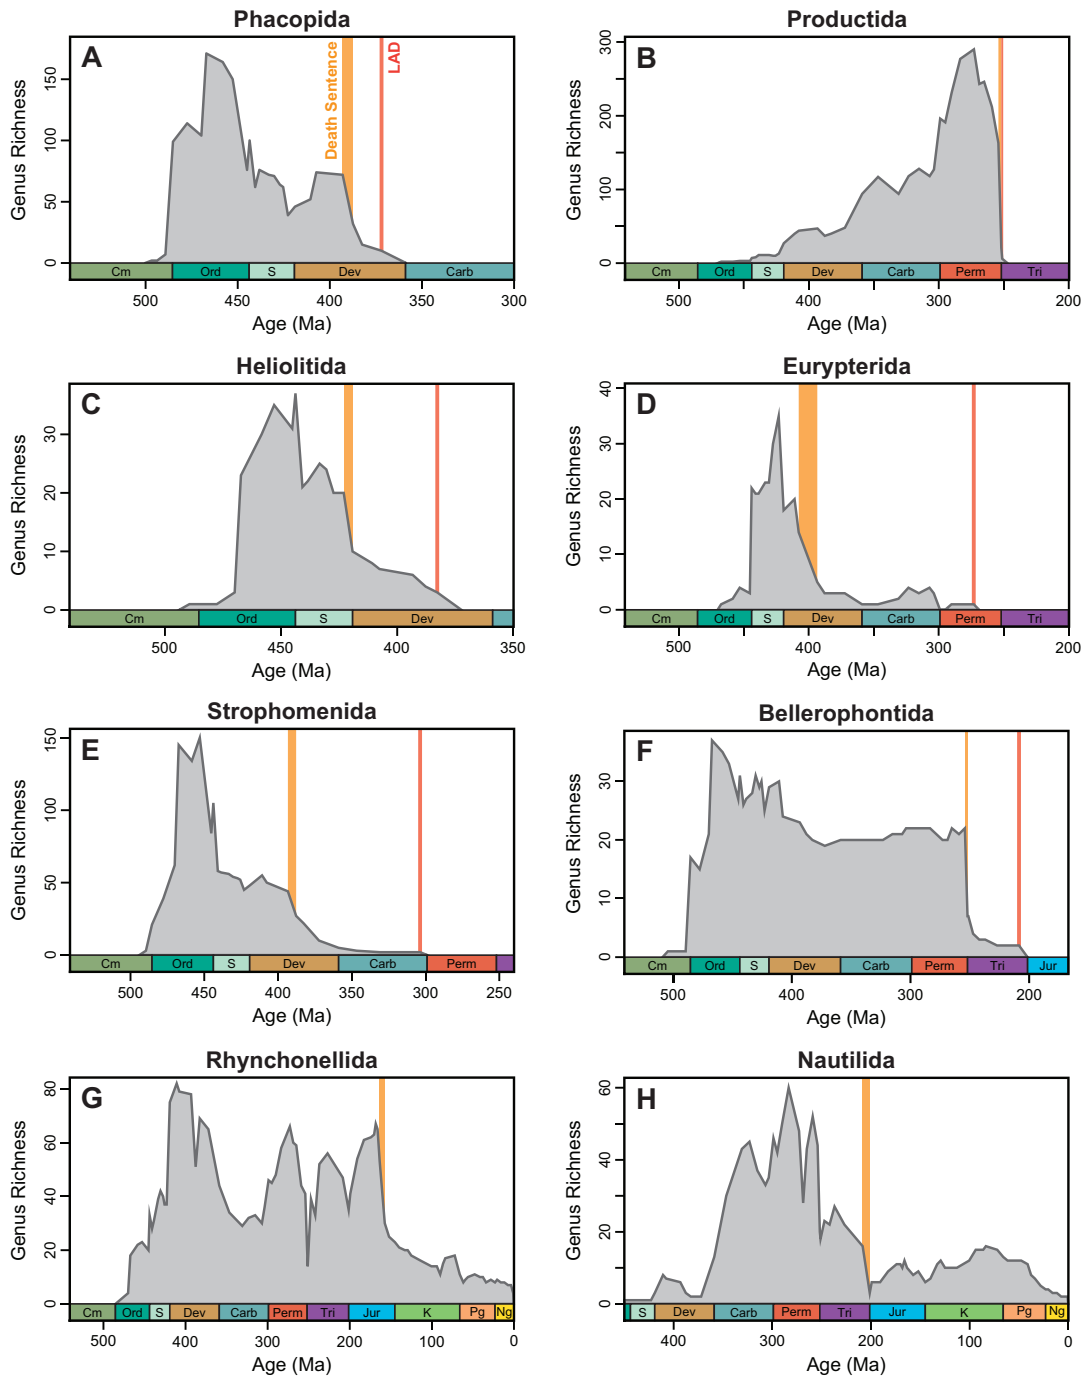

**Fig. S1.** Examples of different DCW diversity patterns in time. All genus richness data has been standardized by shareholder quorum subsampling. Orange and red bars mark the upper boundary of the death sentence and LAD stages, respectively. (A) Arthropod order Phacopida (DCW range: Frasnian–Famennian). (B) Brachiopod order Productida (Induan–Olenekian). (C) Cnidarian order Heliolitida (Lochkovian–Frasnian). (D) Arthropod order Eurypterida (Eifelian–Wuchiapingian). (E) Brachiopod order Strophomenida (Givetian–Gzhelian). (F) Gastropod order Bellerophonitida (Induan–Rhaetian). (G) Brachiopod order Rhynchonellida (Kimmeridgian–Recent). (H) Cephalopod order Nautilida (Hettangian–Recent).

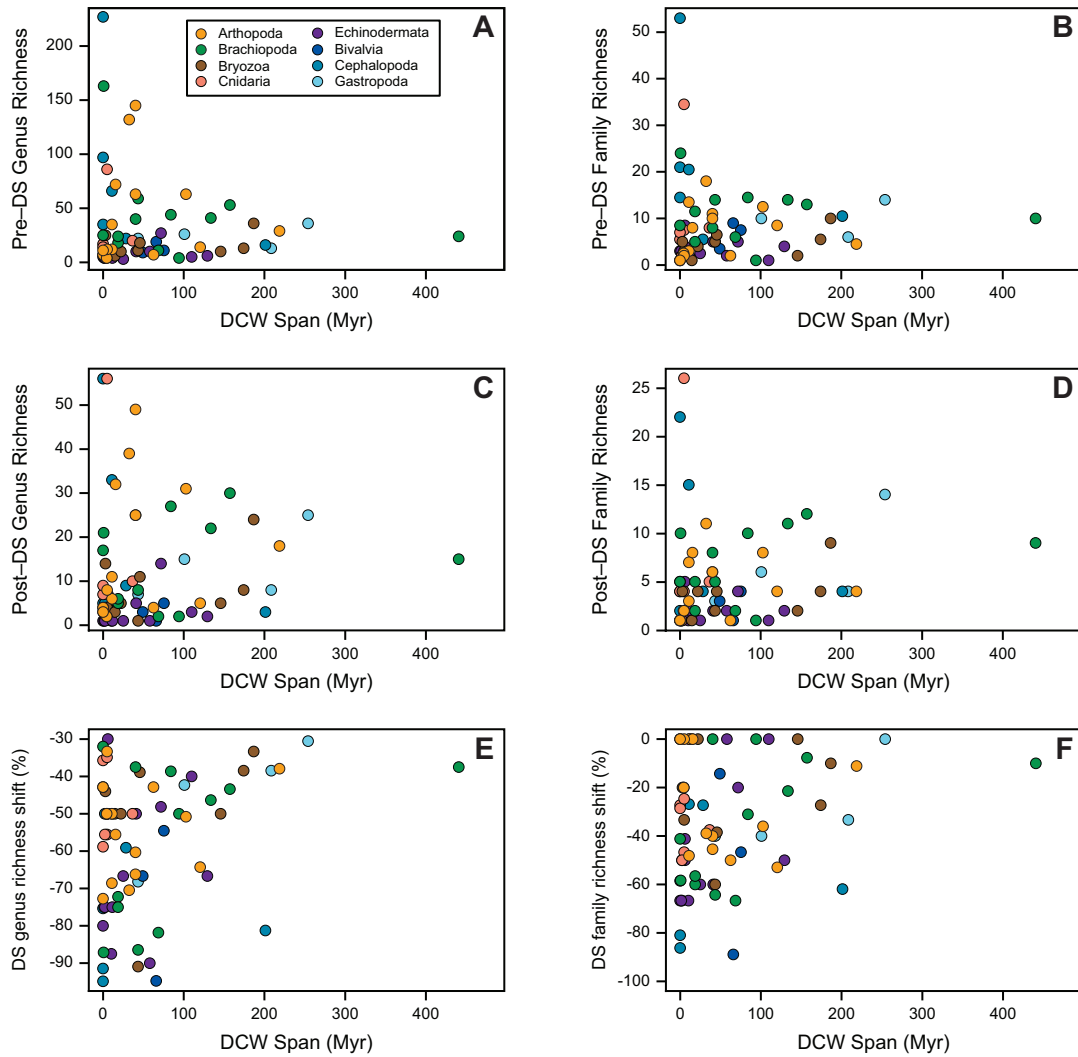

**Fig. S2.** Crossplots of death sentence genus and family richness metrics by DCW span length (Myr). Point colors correspond to phylum/class as in legend in B. (A) Mean genus richness in the two stages prior to death sentence by span. (B) Mean family richness in the two stages prior to death sentence vs. span. (C) Mean genus richness in the two stages after death sentence vs. span. (D) Mean family richness in the two stages after death sentence vs. span. (E) Proportional shift in genus richness across the death sentence stage vs. span. (F) Proportional shift in family richness across the death sentence stage vs. span.

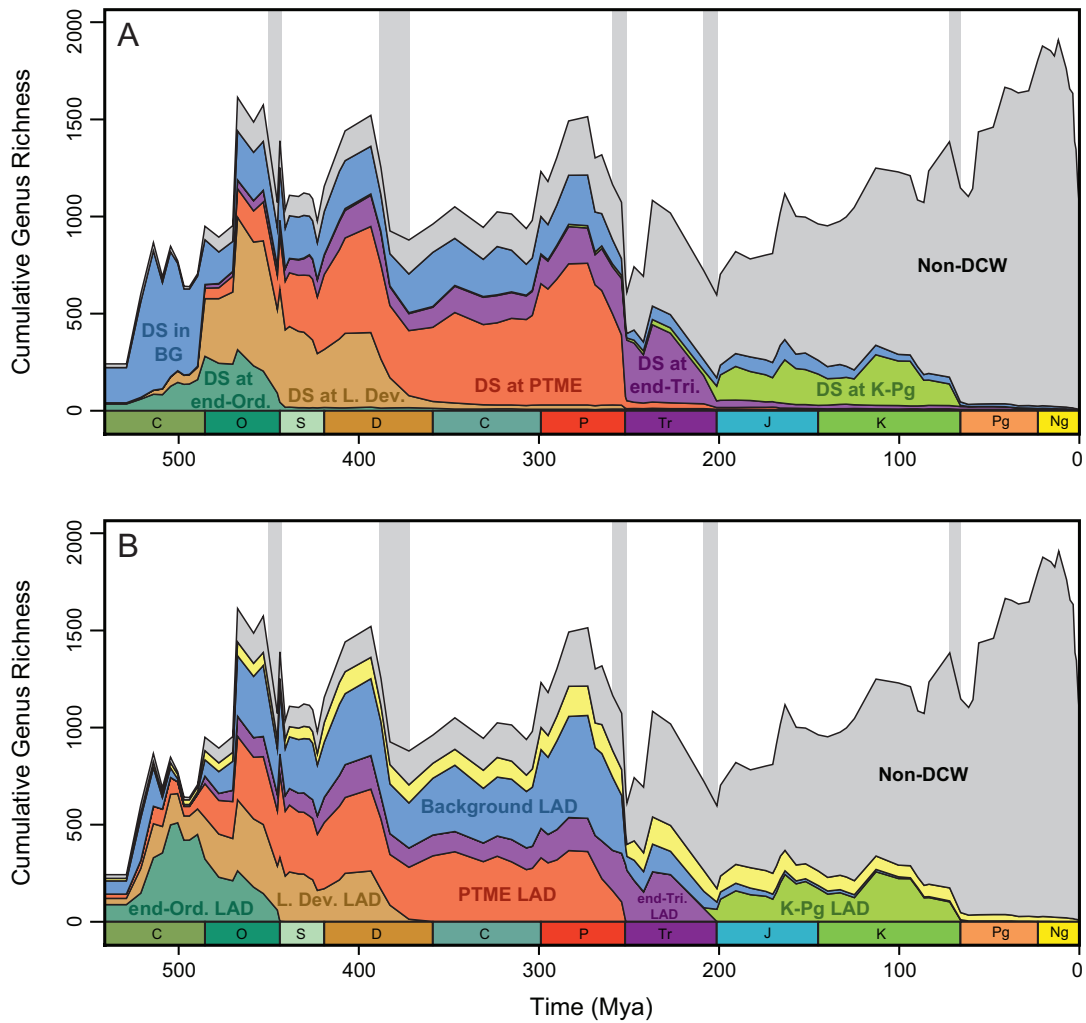

**Fig. S3.** Cumulative genus richness of all DCW and non-DCW orders over the Phanerozoic. (A) Cumulative genus richness trends in DCWs grouped by their death sentence associations. (B) Cumulative genus richness trends in DCWs grouped by their LAD associations. Gray bars mark the stages associated with the Big Five mass extinction in this study. DS, death sentence; LAD, last appearance datum; PTME, Permian–Triassic Mass Extinction; K-Pg, Cretaceous–Paleogene mass extinction.

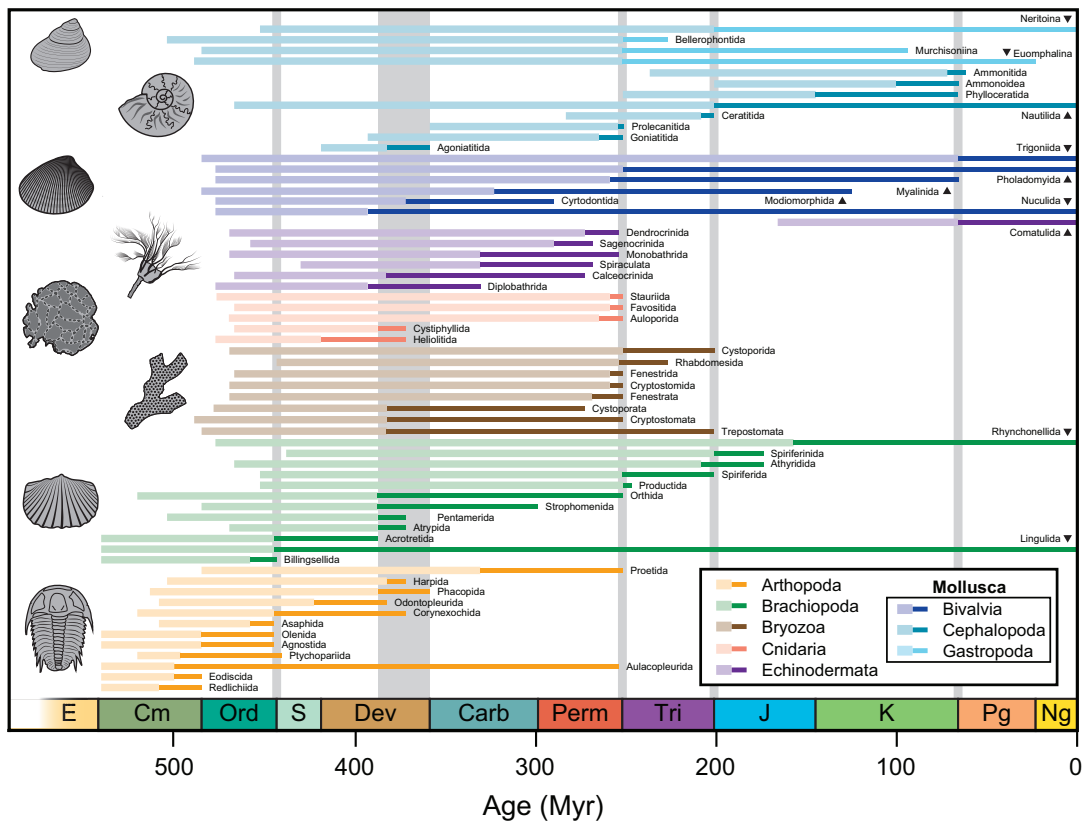

**Fig. S4.** Ranges of 62 order-level Dead Clades Walking determined from Shareholder's Quorum Subsampling standardization of in-bin genus richness (Supplementary Information). Thick lines represent DCW span, from death sentence to LAD; thin lines extend from each clade's first appearance. Gray bars mark the stages associated with Big Five mass extinction events in this study.

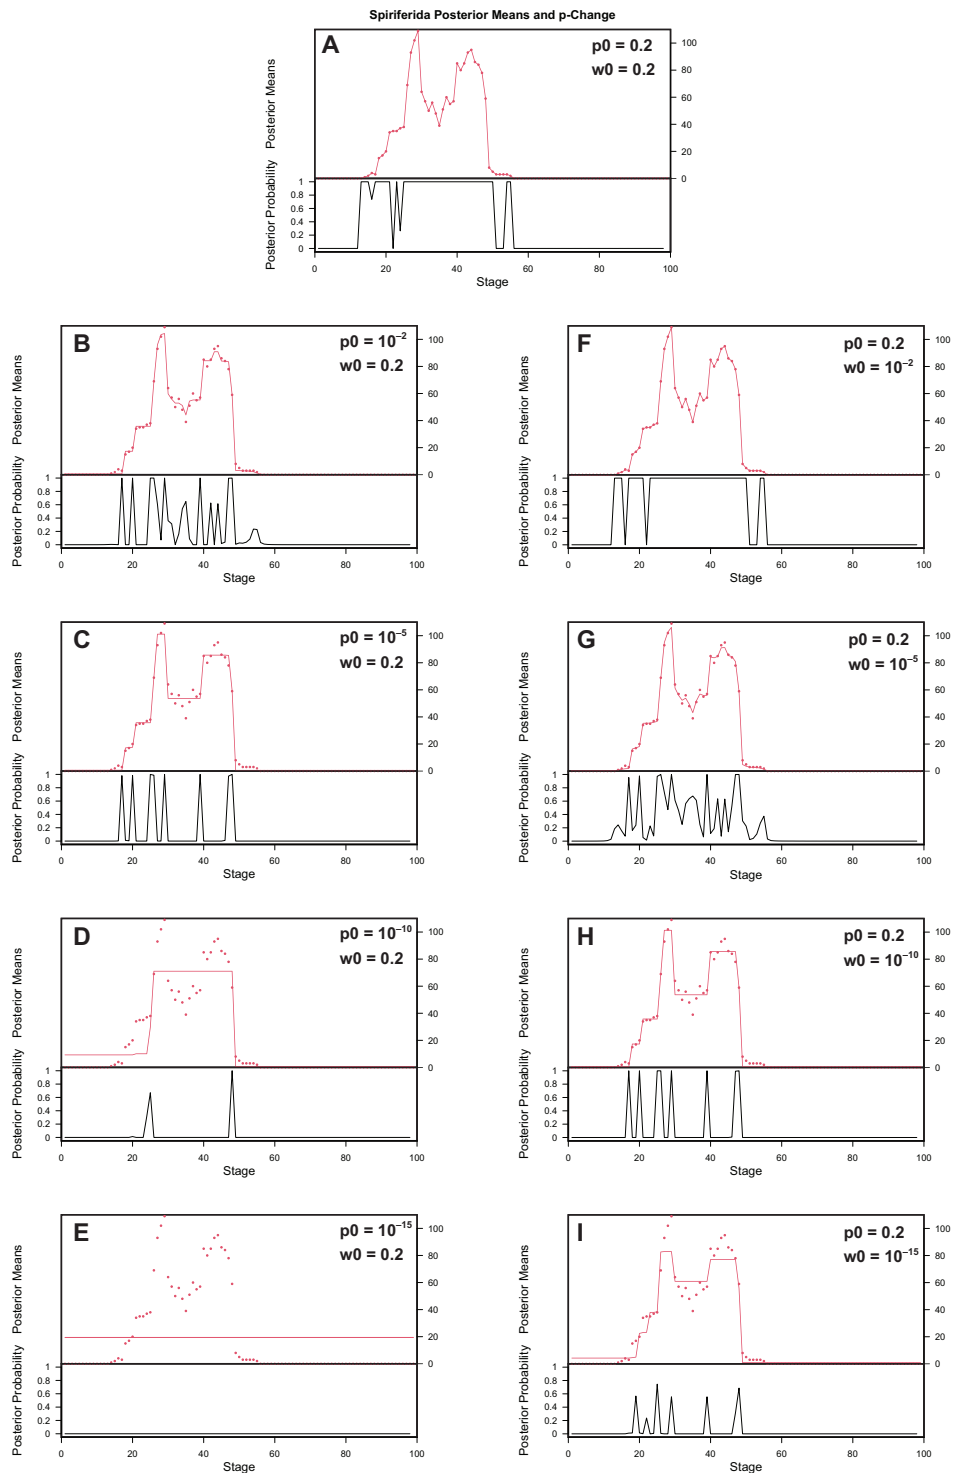

**Fig. S5.** Bayesian change point analysis output for Spiriferida range-through genus richness data (Fig. 1) for different values of hyperparameters  $p_0$  and  $w_0$  (5). (A) Default values ( $p_0 = 0.2$ ,  $w_0 = 0.2$ ). (B)  $p_0 = 10^{-2}$ . (C)  $p_0 = 10^{-5}$ . (D)  $p_0 = 10^{-10}$ . (E)  $p_0 = 10^{-15}$ . Note that decreasing values for  $p_0$  drive the posterior mean output (red line) to identify fewer contiguous blocks of constant value (5). (F)  $w_0 = 10^{-2}$ . (G)  $w_0 = 10^{-5}$ . (H)  $w_0 = 10^{-10}$ . (I)  $w_0 = 10^{-15}$ . Note that decreasing values for  $w_0$  drive the posterior probability output (black line) to identify fewer significant change points corresponding to greater absolute shifts in the posterior mean (5).

**Table S1. List of all DCW orders, their higher taxonomic classification, and assigned death sentence and LAD stages.**

| Order            | Class          | Phylum        | Death Sentence Stage | LAD Stage     |
|------------------|----------------|---------------|----------------------|---------------|
| Acrotretida      | Lingulata      | Brachiopoda   | Aeronian             | Famennian     |
| Agnostida        | Trilobita      | Arthropoda    | Tremadocian          | Hirnantian    |
| Agoniatitida     | Cephalopoda    | Mollusca      | Famennian            | Famennian     |
| Ammonitida       | Cephalopoda    | Mollusca      | Danian               | Danian        |
| Ammonoidea       | Cephalopoda    | Mollusca      | Cenomanian           | Maastrichtian |
| Ampelocrinida    | Crinoidea      | Echinodermata | Capitanian           | Wuchiapingian |
| Asaphida         | Trilobita      | Arthropoda    | Hirnantian           | Hirnantian    |
| Athyridida       | Rhynchonellata | Brachiopoda   | Hettangian           | Toarcian      |
| Atrypida         | Rhynchonellata | Brachiopoda   | Frasnian             | Frasnian      |
| Aulacopleurida   | Trilobita      | Arthropoda    | Floian               | Wuchiapingian |
| Auloporida       | Anthozoa       | Cnidaria      | Wuchiapingian        | Changhsingian |
| Bellerophonitida | Gastropoda     | Mollusca      | Induan               | Rhaetian      |
| Calceocrinida    | Crinoidea      | Echinodermata | Eifelian             | Kungurian     |
| Ceratitida       | Cephalopoda    | Mollusca      | Rhaetian             | Rhaetian      |
| Corynexochida    | Trilobita      | Arthropoda    | Tremadocian          | Frasnian      |
| Craniopsida      | Craniata       | Brachiopoda   | Aeronian             | Visean        |
| Cryptostomata    | Stenolaemata   | Bryozoa       | Aeronian             | Changhsingian |
| Cryptostomida    | Stenolaemata   | Bryozoa       | Wuchiapingian        | Changhsingian |
| Cyathocrinida    | Crinoidea      | Echinodermata | Changhsingian        | Changhsingian |
| Cyrtocrinida     | Crinoidea      | Echinodermata | Barremian            | Extant        |
| Cyrtodontida     | Bivalvia       | Mollusca      | Tournaisian          | Kungurian     |
| Cystiphyllida    | Anthozoa       | Cnidaria      | Frasnian             | Frasnian      |
| Cystoporata      | Stenolaemata   | Bryozoa       | Frasnian             | Carnian       |
| Cystoporida      | Stenolaemata   | Bryozoa       | Induan               | Rhaetian      |
| Dendrocrinida    | Crinoidea      | Echinodermata | Capitanian           | Wuchiapingian |
| Diplobathrida    | Crinoidea      | Echinodermata | Givetian             | Visean        |
| Eodiscida        | Trilobita      | Arthropoda    | Guzhangian           | Stage 10      |
| Euomphalina      | Gastropoda     | Mollusca      | Changhsingian        | Extant        |
| Eurypterida      |                | Arthropoda    | Eifelian             | Roadian       |
| Favositida       | Anthozoa       | Cnidaria      | Changhsingian        | Changhsingian |
| Fenestrata       | Stenolaemata   | Bryozoa       | Wordian              | Changhsingian |
| Fenestrata       | Stenolaemata   | Bryozoa       | Changhsingian        | Olenekian     |
| Goniatitida      | Cephalopoda    | Mollusca      | Capitanian           | Changhsingian |
| Harpida          | Trilobita      | Arthropoda    | Hirnantian           | Frasnian      |
| Heliolitida      | Anthozoa       | Cnidaria      | Lochkovian           | Frasnian      |
| Homocrinida      | Crinoidea      | Echinodermata | Aeronian             | Homerian      |
| Hybocrinida      | Crinoidea      | Echinodermata | Hirnantian           | Rhuddanian    |
| Lichenariida     | Anthozoa       | Cnidaria      | Aeronian             | Telychian     |
| Lichida          | Trilobita      | Arthropoda    | Givetian             | Givetian      |
| Lingulida        | Lingulata      | Brachiopoda   | Aeronian             | Extant        |
| Megalodontida    | Bivalvia       | Mollusca      | Hettangian           | Tithonian     |
| Monobathrida     | Crinoidea      | Echinodermata | Serpukhovian         | Wuchiapingian |
| Murchisoniina    | Gastropoda     | Mollusca      | Hettangian           | Cenomanian    |
| Myelodaetylida   | Crinoidea      | Echinodermata | Aeronian             | Telychian     |
| Nautilida        | Cephalopoda    | Mollusca      | Hettangian           | Extant        |
| Neritoina        | Gastropoda     | Mollusca      | Rhaetian             | Extant        |
| Obolellida       | Obolellata     | Brachiopoda   | Wuliuan              | Drumian       |
| Odontopleurida   | Trilobita      | Arthropoda    | Givetian             | Frasnian      |
| Olenida          | Trilobita      | Arthropoda    | Tremadocian          | Hirnantian    |
| Orthida          | Rhynchonellata | Brachiopoda   | Givetian             | Changhsingian |
| Pentamerida      | Rhynchonellata | Brachiopoda   | Pridoli              | Frasnian      |
| Phacopida        | Trilobita      | Arthropoda    | Givetian             | Famennian     |
| Productida       | Strophomenata  | Brachiopoda   | Induan               | Olenekian     |
| Proetida         | Trilobita      | Arthropoda    | Serpukhovian         | Changhsingian |
| Prolecanitida    | Cephalopoda    | Mollusca      | Changhsingian        | Induan        |
| Ptychopariida    | Trilobita      | Arthropoda    | Tremadocian          | Katian        |
| Redlichiida      | Trilobita      | Arthropoda    | Guzhangian           | Stage 10      |
| Rhabdomesida     | Stenolaemata   | Bryozoa       | Wuchiapingian        | Carnian       |
| Rhynchonellida   | Rhynchonellata | Brachiopoda   | Kimmeridgian         | Extant        |



|                |                |               |               |               |
|----------------|----------------|---------------|---------------|---------------|
| Sagenocrinida  | Crinoidea      | Echinodermata | Artinskian    | Capitanian    |
| Siphonotretida | Lingulata      | Brachiopoda   | Hirnantian    | Hirnantian    |
| Spiraculata    |                | Echinodermata | Serpukhovian  | Roadian       |
| Spiriferida    | Rhynchonellata | Brachiopoda   | Induan        | Rhaetian      |
| Spiriferinida  | Rhynchonellata | Brachiopoda   | Hettangian    | Toarcian      |
| Stauriida      | Anthozoa       | Cnidaria      | Wuchiapingian | Changhsingian |
| Strophomenida  | Strophomenata  | Brachiopoda   | Givetian      | Gzhelian      |
| Taxocrinida    | Crinoidea      | Echinodermata | Moscovian     | Gzhelian      |
| Trepostomata   | Stenolaemata   | Bryozoa       | Frasnian      | Rhaetian      |
| Trepostomida   | Stenolaemata   | Bryozoa       | Changhsingian | Rhaetian      |
| Trigoniida     | Bivalvia       | Mollusca      | Danian        | Extant        |

---

**Table S2. Diversity and longevity statistics for DCWs, organized by associated major mass extinction (ME) event or background (BG) stages. GR, genus richness; FR, family richness.**

| ME          | Death Sentences              |                              |                       |                       |                             | LADs                  |                       |
|-------------|------------------------------|------------------------------|-----------------------|-----------------------|-----------------------------|-----------------------|-----------------------|
|             | $\Delta$ GR (%) <sup>a</sup> | $\Delta$ FR (%) <sup>a</sup> | Sust. GR <sup>b</sup> | Sust. FR <sup>b</sup> | DCW span (Myr) <sup>c</sup> | Sust. GR <sup>d</sup> | Sust. FR <sup>d</sup> |
| <b>Ord</b>  | -52.2                        | -43.2                        | 3.50                  | 1.00                  | 0.70                        | 12.0                  | 2.14                  |
| <b>Dev</b>  | -50.0                        | -27.3                        | 5.50                  | 3.12                  | 15.5                        | 6.33                  | 2.62                  |
| <b>Perm</b> | -50.0                        | -39.2                        | 4.00                  | 2.86                  | 4.96                        | 7.00                  | 3.69                  |
| <b>Tri</b>  | -72.2                        | -56.5                        | 6.50                  | 3.68                  | 49.2                        | 3.93                  | 3.27                  |
| <b>Cret</b> | -94.8*                       | -84.9*                       | 3.17*                 | 2.50*                 | 32.9*                       | 4.92*                 | 2.92*                 |
| <b>BG</b>   | -52.7                        | -31.6                        | 4.67                  | 2.27                  | 40.2                        | 2.50                  | 2.00                  |

<sup>a</sup> Calculated as the median proportional change from the genus and family richness of the stage prior to the death sentence to the stage following the death sentence.

<sup>b</sup> Sustained diversity following the DCWs' death sentence at a ME or BG stage, calculated from the median genus and family richness in all bins from death sentence to LAD.

<sup>c</sup> Calculated as the median duration from the top of the death sentence stage to the top of the LAD stage.

<sup>d</sup> Sustained diversity prior to the DCWs' LAD at a ME or BG stage, calculated from the median genus and family richness in all bins from death sentence to LAD.

\* Number of data < 3

**Table S3. Diversity and longevity statistics for DCWs, organized by phylum and class. GR, genus richness; FR, family richness.**

| <b>Phylum / Class</b> | <b># of DCW orders<sup>a</sup></b> | <b><math>\Delta</math> GR (%)<sup>b</sup></b> | <b><math>\Delta</math> FR (%)<sup>b</sup></b> | <b>Sust. GR<sup>c</sup></b> | <b>Sust. FR<sup>c</sup></b> | <b>DCW span (Myr)<sup>d</sup></b> |
|-----------------------|------------------------------------|-----------------------------------------------|-----------------------------------------------|-----------------------------|-----------------------------|-----------------------------------|
| <b>Arthropoda</b>     | 14/14                              | -61.0                                         | -36.2                                         | 10.0                        | 2.78                        | 36.3                              |
| <b>Brachiopoda</b>    | 14/26                              | -48.2                                         | -26.2                                         | 6.87                        | 4.23                        | 41.9                              |
| <b>Bryozoa</b>        | 9/12                               | -50.0                                         | -20.0                                         | 2.75                        | 2.00                        | 43.4                              |
| <b>Cnidaria</b>       | 6/9                                | -52.8                                         | -33.0                                         | 6.67                        | 4.25                        | 3.63                              |
| <b>Echinodermata</b>  | 13/20                              | -66.7                                         | -50.0                                         | 1.50                        | 1.50                        | 11.5                              |
| <b>Mollusca</b>       | 14/53                              | -62.9                                         | -43.3                                         | 4.42                        | 2.64                        | 46.3                              |
| <i>Bivalvia</i>       | 3/27                               | -66.7                                         | -46.7                                         | 2.45                        | 2.00                        | 65.9                              |
| <i>Cephalopoda</i>    | 7/9                                | -75.3                                         | -61.9                                         | 5.00                        | 3.68                        | 2.24                              |
| <i>Gastropoda</i>     | 4/17                               | -40.4                                         | -36.7                                         | 5.86                        | 3.89                        | 155                               |

<sup>a</sup> Note that the total numbers of orders (denominator) represent only the orders which were analyzed for significant change points, and thus exclude orders whose maximum genus richness < 5.

<sup>b</sup> Calculated as the proportional change from the median genus and family richness in the stage preceding the death sentence to the stage following the death sentence.

<sup>c</sup> Sustained diversity following the DCWs' death sentence at a ME or BG stage, calculated from the median genus and family richness in all bins from death sentence to LAD.

<sup>d</sup> Calculated as the median duration from the bottom of the death sentence stage, to the top of the LAD stage.

**Table S4. Canonical order LADs and references.**

| Order              | Class           | Phylum        | LAD stage     | References   |
|--------------------|-----------------|---------------|---------------|--------------|
| Acrotretida        | Lingulata       | Brachiopoda   | U. Dev.       | (6)          |
| Actiniaria         | Anthozoa        | Cnidaria      | Rec.          | (7)          |
| Actinodontida      | Bivalvia        | Mollusca      | U. Perm.      | (8, 9)       |
| Aethocrinida       | Crinoidea       | Echinodermata | M. Ord.       | (10)         |
| Afghanodesmatida   | Bivalvia        | Mollusca      | Darriwilian   | (11)         |
| Agnostida          | Trilobita       | Arthropoda    | Hirnantian    | (12)         |
| Agoniatitida       | Cephalopoda     | Mollusca      | Famennian     | (13, 14)     |
| Alcyonacea         | Anthozoa        | Cnidaria      | Rec.          | (12)         |
| Allogastropoda     | Gastropoda      | Mollusca      | Rec.          | (12)         |
| Ammonitida         | Cephalopoda     | Mollusca      | Danian        | (12, 15, 16) |
| Ammonoidea         | Cephalopoda     | Mollusca      | Danian        | (16, 17)     |
| Ampelocrinida      | Crinoidea       | Echinodermata | Wuchiapingian | (12)         |
| Anaspidea          | Gastropoda      | Mollusca      | Rec.          | (12)         |
| Angulata           | Crinoidea       | Echinodermata | U. Ord.       | (18)         |
| Archaeogastropoda  | Gastropoda      | Mollusca      | Rec.          | (19)         |
| Architaenioglossa  | Gastropoda      | Mollusca      | Rec.          | (20)         |
| Architectibranchia | Gastropoda      | Mollusca      | Rec.          | (21)         |
| Arcida             | Bivalvia        | Mollusca      | Rec.          | (12)         |
| Asaphida           | Trilobita       | Arthropoda    | Hirnantian    | (12)         |
| Athyridida         | Rhynchonellata  | Brachiopoda   | U. Jur.       | (6)          |
| Atrypida           | Rhynchonellata  | Brachiopoda   | Frasnan       | (6, 22)      |
| Aulacopleurida     | Trilobita       | Arthropoda    | Wuchiapingian | (12, 23, 24) |
| Auloporida         | Anthozoa        | Cnidaria      | U. Perm.      | (25)         |
| Basommatophora     | Gastropoda      | Mollusca      | Rec.          | (12)         |
| Bellerophonitida   | Gastropoda      | Mollusca      | Rhaetian      | (12)         |
| Billingsellida     | Strophomenata   | Brachiopoda   | U. Ord.       | (6)          |
| Bourgueticrinida   | Crinoidea       | Echinodermata | Rec.          | (12)         |
| Calceocrinida      | Crinoidea       | Echinodermata | Kungurian     | (12)         |
| Cardiida           | Bivalvia        | Mollusca      | Rec.          | (12)         |
| Carditida          | Bivalvia        | Mollusca      | Rec.          | (12)         |
| Cephalaspida       | Gastropoda      | Mollusca      | Rec.          | (12)         |
| Cephalaspidea      | Gastropoda      | Mollusca      | Rec.          | (12)         |
| Ceratitida         | Cephalopoda     | Mollusca      | Rhaetian      | (12)         |
| Cerithimorpha      | Gastropoda      | Mollusca      | Changhsingian | (12)         |
| Cheilostomata      | Gymnolaemata    | Bryozoa       | Rec.          | (12)         |
| Cheilostomatida    | Gymnolaemata    | Bryozoa       | Rec.          | (12)         |
| Chileida           | Chileata        | Brachiopoda   | M. Cam.       | (6)          |
| Clymeniida         | Cephalopoda     | Mollusca      | Famennian     | (12)         |
| Coenothecalia      | Anthozoa        | Cnidaria      | Rec.          | (26)         |
| Colpomyida         | Bivalvia        | Mollusca      | Darriwilian   | (12)         |
| Comatulida         | Crinoidea       | Echinodermata | Rec.          | (27)         |
| Corynexochida      | Trilobita       | Arthropoda    | Frasnian      | (12)         |
| Craniida           | Craniata        | Brachiopoda   | Rec.          | (6)          |
| Craniopsida        | Craniata        | Brachiopoda   | L. Carb.      | (6)          |
| Cryptostomata      | Stenolaemata    | Bryozoa       | Rhaetian      | (12)         |
| Cryptostomida      | Stenolaemata    | Bryozoa       | Perm.         | (28, 29)     |
| Ctenostomata       | Gymnolaemata    | Bryozoa       | Messinian     | (12)         |
| Cyathocrinida      | Crinoidea       | Echinodermata | U. Perm.      | (12, 30)     |
| Cyathocystida      | Edrioasteroidea | Echinodermata | Hirnantian    | (12)         |
| Cycloneritimorpha  | Gastropoda      | Mollusca      | Rec.          | (12)         |
| Cyclostomata       | Stenolaemata    | Bryozoa       | Rec.          | (12)         |
| Cyclostomatida     | Stenolaemata    | Bryozoa       | Rec.          | (12)         |
| Cyrtocrinida       | Crinoidea       | Echinodermata | Rec.          | (27)         |
| Cyrtodontida       | Bivalvia        | Mollusca      | L. Perm.      | (12, 31)     |
| Cyrtoneritimorpha  | Gastropoda      | Mollusca      | Perm.         | (12, 32)     |
| Cystiphyllida      | Anthozoa        | Cnidaria      | Frasnian      | (12)         |
| Cystoporata        | Stenolaemata    | Bryozoa       | Carnian       | (12)         |
| Cystoporida        | Stenolaemata    | Bryozoa       | Rhaetian      | (12, 33)     |
| Dendrocrinida      | Crinoidea       | Echinodermata | Wuchiapingian | (12)         |

|                  |                 |               |               |              |
|------------------|-----------------|---------------|---------------|--------------|
| Dictyonellida    | Chileata        | Brachiopoda   | L. Perm.      | (6)          |
| Diplobathrida    | Crinoidea       | Echinodermata | Visean        | (12)         |
| Edrioasterida    | Edrioasteroidea | Echinodermata | Emsian        | (12)         |
| Edrioblastoidea  | Edrioasteroidea | Echinodermata | Darriwilian   | (12)         |
| Encrinida        | Crinoidea       | Echinodermata | U. Tri.       | (27)         |
| Entomotaeniata   | Gastropoda      | Mollusca      | Rec.          | (12)         |
| Eodiscida        | Trilobita       | Arthropoda    | Stage 10      | (12)         |
| Esthonioporata   | Stenolaemata    | Bryozoa       | Kungurian     | (12)         |
| Euomphalina      | Gastropoda      | Mollusca      | Rec.          | (12)         |
| Eustenocrinida   | Crinoidea       | Echinodermata | Homerian      | (12)         |
| Favositida       | Anthozoa        | Cnidaria      | Changhsingian | (12)         |
| Fenestrata       | Stenolaemata    | Bryozoa       | Perm.         | (12)         |
| Fenestrada       | Stenolaemata    | Bryozoa       | Olenekian     | (12)         |
| Fissiculata      | NA              | Echinodermata | Changhsingian | (12)         |
| Fordillida       | Bivalvia        | Mollusca      | Stage 10      | (12)         |
| Goniaticida      | Cephalopoda     | Mollusca      | Changhsingian | (34)         |
| Gorgonacea       | Anthozoa        | Cnidaria      | Rec.          | (12)         |
| Granatocrinida   | NA              | Echinodermata | Visean        | (12)         |
| Harpida          | Trilobita       | Arthropoda    | Frasnian      | (12)         |
| Heliolitida      | Anthozoa        | Cnidaria      | Frasnian      | (12, 35)     |
| Helioporacea     | Anthozoa        | Cnidaria      | Rec.          | (12)         |
| Heterocorallia   | Anthozoa        | Cnidaria      | Serpukhovian  | (12)         |
| Heterostropha    | Gastropoda      | Mollusca      | Rec.          | (12)         |
| Heterostrophia   | Gastropoda      | Mollusca      | Rec.          | (12)         |
| Hiatellida       | Bivalvia        | Mollusca      | Rec.          | (12)         |
| Hippuritida      | Bivalvia        | Mollusca      | Maastrichtian | (12)         |
| Holocrinida      | Crinoidea       | Echinodermata | U. Tri.       | (27)         |
| Homocrinida      | Crinoidea       | Echinodermata | Homerian      | (12)         |
| Hybocrinida      | Crinoidea       | Echinodermata | Telychian     | (12)         |
| Isocrinida       | Crinoidea       | Echinodermata | Rec.          | (27)         |
| Isorophida       | Edrioasteroidea | Echinodermata | Gzhelian      | (12)         |
| Kilbuchophyllida | Anthozoa        | Cnidaria      | Katian        | (12)         |
| Kutorginida      | Kutorginata     | Brachiopoda   | M. Cam.       | (6)          |
| Lichenariida     | Anthozoa        | Cnidaria      | Telychian     | (12)         |
| Lichida          | Trilobita       | Arthropoda    | Famennian     | (12)         |
| Lingulida        | Lingulata       | Brachiopoda   | Rec.          | (6)          |
| Lucinida         | Bivalvia        | Mollusca      | Rec.          | (12)         |
| Maennilicrinida  | Crinoidea       | Echinodermata | Ord.          | (36)         |
| Megalodontida    | Bivalvia        | Mollusca      | Tithonian     | (12)         |
| Millericrinida   | Crinoidea       | Echinodermata | L. Cret.      | (27)         |
| Mitrosagophora   | NA              | Brachiopoda   | L. Cam.       | (37)         |
| Modiomorphida    | Bivalvia        | Mollusca      | L. Cret.      | (38, 39)     |
| Monobathrida     | Crinoidea       | Echinodermata | Wuchiapingian | (12, 40)     |
| Murchisoniina    | Gastropoda      | Mollusca      | Cenomanian    | (12)         |
| Myalinida        | Bivalvia        | Mollusca      | Maastrichtian | (12)         |
| Myelodactylida   | Crinoidea       | Echinodermata | Telychian     | (12)         |
| Myoidea          | Bivalvia        | Mollusca      | Rec.          | (12)         |
| Mytilida         | Bivalvia        | Mollusca      | Rec.          | (12)         |
| Naraoiida        | Trilobita       | Arthropoda    | Hirnantian    | (12)         |
| Naukatida        | Obolellata      | Brachiopoda   | M. Cam.       | (6)          |
| Nautilida        | Cephalopoda     | Mollusca      | Rec.          | (12)         |
| Neogastropoda    | Gastropoda      | Mollusca      | Rec.          | (12)         |
| Neotaenioglossa  | Gastropoda      | Mollusca      | Maastrichtian | (12)         |
| Neritoina        | Gastropoda      | Mollusca      | Rec.          | (12)         |
| Notaspidea       | Gastropoda      | Mollusca      | Rec.          | (12)         |
| Nuculanida       | Bivalvia        | Mollusca      | Rec.          | (12)         |
| Nuculida         | Bivalvia        | Mollusca      | Rec.          | (12)         |
| Obolellida       | Obolellata      | Brachiopoda   | M. Cam.       | (6)          |
| Odontopleurida   | Trilobita       | Arthropoda    | Famennian     | (12, 41, 42) |
| Olenida          | Trilobita       | Arthropoda    | Hirnantian    | (12)         |
| Opisthobranchia  | Gastropoda      | Mollusca      | Rec.          | (12)         |

|                   |                 |               |               |              |
|-------------------|-----------------|---------------|---------------|--------------|
| Orthida           | Rhynchonellata  | Brachiopoda   | U. Perm.      | (6)          |
| Orthotetida       | Strophomenata   | Brachiopoda   | U. Perm.      | (6)          |
| Ostreida          | Bivalvia        | Mollusca      | Rec.          | (12)         |
| Pandorida         | Bivalvia        | Mollusca      | Rec.          | (12)         |
| Patellogastropoda | Gastropoda      | Mollusca      | Rec.          | (12)         |
| Paterinida        | Paterinata      | Brachiopoda   | U. Ord.       | (6)          |
| Pectinida         | Bivalvia        | Mollusca      | Rec.          | (12)         |
| Pennatulacea      | Anthozoa        | Cnidaria      | Rec.          | (12)         |
| Pentacystida      | Edrioasteroidea | Echinodermata | Hirnantian    | (12)         |
| Pentamerida       | Rhynchonellata  | Brachiopoda   | Frasnian      | (6, 43)      |
| Pentasmiliida     | Anthozoa        | Cnidaria      | Tri.          | (44)         |
| Phacopida         | Trilobita       | Arthropoda    | Famennian     | (12, 41, 45) |
| Pholadida         | Bivalvia        | Mollusca      | Rec.          | (12)         |
| Pholadomyida      | Bivalvia        | Mollusca      | Rec.          | (12)         |
| Phylloceratida    | Cephalopoda     | Mollusca      | Maastrichtian | (12)         |
| Phylloceratitida  | Cephalopoda     | Mollusca      | Maastrichtian | (12)         |
| Pisocrinida       | Crinoidea       | Echinodermata | Eifelian      | (12)         |
| Porocrinida       | Crinoidea       | Echinodermata | Hirnantian    | (12)         |
| Poromyida         | Bivalvia        | Mollusca      | Rec.          | (12)         |
| Poteriocrinina    | Crinoidea       | Echinodermata | Perm.         | (46, 47)     |
| Productida        | Strophomenata   | Brachiopoda   | L. Tri.       | (6, 48)      |
| Proetida          | Trilobita       | Arthropoda    | Changhsingian | (12, 24, 49) |
| Prolecanitida     | Cephalopoda     | Mollusca      | Induan        | (34, 50, 51) |
| Proparia          | Trilobita       | Arthropoda    | Stage 10      | (12)         |
| Protobranchia     | Bivalvia        | Mollusca      | Famennian     | (12)         |
| Protocrinoida     | Crinoidea       | Echinodermata | Tremadocian   | (52)         |
| Pterorthida       | Rhynchonellata  | Brachiopoda   | U. Dev.       | (6, 53)      |
| Pterioidea        | Bivalvia        | Mollusca      | Rec.          | (12)         |
| Ptychopariida     | Trilobita       | Arthropoda    | Frasnian      | (12)         |
| Redlichiida       | Trilobita       | Arthropoda    | Stage 10      | (12)         |
| Rhabdomesida      | Stenolaemata    | Bryozoa       | Carnian       | (12)         |
| Rhynchonellida    | Rhynchonellata  | Brachiopoda   | Rec.          | (6)          |
| Roveacrinida      | Crinoidea       | Echinodermata | Danian        | (27)         |
| Sagenocrinida     | Crinoidea       | Echinodermata | Oxfordian     | (12)         |
| Sarcinulida       | Anthozoa        | Cnidaria      | Telychian     | (12)         |
| Scleractinia      | Anthozoa        | Cnidaria      | Rec.          | (12)         |
| Siphonotretida    | Lingulata       | Brachiopoda   | Ord.          | (6)          |
| Solemyida         | Bivalvia        | Mollusca      | Rec.          | (12)         |
| Solemyoida        | Bivalvia        | Mollusca      | Darriwilian   | (12)         |
| Solenida          | Bivalvia        | Mollusca      | Rec.          | (12)         |
| Sorbeoconcha      | Gastropoda      | Mollusca      | Rec.          | (12)         |
| Spiraculata       | NA              | Echinodermata | Capitanian    | (12)         |
| Spiriferida       | Rhynchonellata  | Brachiopoda   | U. Tri.       | (6)          |
| Spiriferinida     | Rhynchonellata  | Brachiopoda   | L. Jur.       | (6)          |
| Stauriida         | Anthozoa        | Cnidaria      | Changhsingian | (12, 54)     |
| Stolonifera       | Anthozoa        | Cnidaria      | Rec.          | (26)         |
| Strophomenida     | Strophomenata   | Brachiopoda   | Carb.         | (55)         |
| Tabulaconida      | Anthozoa        | Cnidaria      | L. Cam.       | (56)         |
| Taxocrinida       | Crinoidea       | Echinodermata | Sakmarian     | (12)         |
| Tectibranchia     | Gastropoda      | Mollusca      | Rec.          | (12)         |
| Terebratulida     | Rhynchonellata  | Brachiopoda   | Rec.          | (6)          |
| Tetradiida        | Anthozoa        | Cnidaria      | Hirnantian    | (12)         |
| Tetragonocrinida  | Crinoidea       | Echinodermata | Darriwilian   | (12)         |
| Thecideida        | Rhynchonellata  | Brachiopoda   | Rec.          | (6)          |
| Thecosomata       | Gastropoda      | Mollusca      | Rec.          | (12)         |
| Thraciida         | Bivalvia        | Mollusca      | Rec.          | (12)         |
| Tommotiida        | NA              | Brachiopoda   | M. Cam.       | (57)         |
| Trepostomata      | Stenolaemata    | Bryozoa       | Rhaetian      | (12)         |
| Trepostomida      | Stenolaemata    | Bryozoa       | Rhaetian      | (12)         |
| Trigoniida        | Bivalvia        | Mollusca      | Rec.          | (12)         |
| Trimerellida      | Craniata        | Brachiopoda   | Sil.          | (6)          |

|                 |            |          |            |      |
|-----------------|------------|----------|------------|------|
| Tuarangiida     | Bivalvia   | Mollusca | Guzhangian | (12) |
| Umbraculomorpha | Gastropoda | Mollusca | Priabonian | (12) |
| Unionida        | Bivalvia   | Mollusca | Rec.       | (58) |
| Veneroidei      | Bivalvia   | Mollusca | Rec.       | (12) |

---

15 **References**

- 16 1. J Alroy, C R Marshall, R K Bambach, K Bezusko, M Foote, F T Fürsich, T A Hansen, S M Holland, L C Ivany,  
17 D Jablonski, D K Jacobs, D C Jones, M A Kosnik, S Lidgard, S Low, A I Miller, P M Novack-Gottshall, T D Olszewski,  
18 M E Patzkowsky, D M Raup, K Roy, J J Sepkoski, M G Sommers, P J Wagner, and A Webber. Effects of sampling  
19 standardization on estimates of Phanerozoic marine diversification. *Proceedings of the National Academy of Sciences*, 98:  
20 6261–6266, 2001.
- 21 2. John Alroy. Fair sampling of taxonomic richness and unbiased estimation of origination and extinction rates. *Paleontological*  
22 *Society Papers*, 16:55–80, 2010.
- 23 3. Andrew Zaffos, Seth Finnegan, and Shanan E Peters. Plate tectonic regulation of global marine animal diversity. *Proceedings*  
24 *of the National Academy of Sciences*, 114(22):5653–5658, 2017.
- 25 4. John Alroy. Geographical, environmental and intrinsic biotic controls on Phanerozoic marine diversification. *Palaeontology*,  
26 53(6):1211–1235, 2010.
- 27 5. Daniel Barry and J. A. Hartigan. A Bayesian Analysis for Change Point Problems. *Journal of the American Statistical*  
28 *Association*, 88(421):309–319, 1993. ISSN 0162-1459. .
- 29 6. Alwyn Williams, C. H. C. Brunton, and S. J. Carlson. *Treatise on Invertebrate Paleontology, Part H, Brachiopoda*  
30 *(Revised), Volume 6: Supplement*. Geological Society of America and University of Kansas Press, Boulder, CO and  
31 Lawrence, Kansas, 2007.
- 32 7. J B Caron and D A Jackson. Paleocology of the greater phyllopod bed community, burgess shale. *Palaeogeography*  
33 *Palaeoclimatology Palaeoecology*, 258:222–256, 2008.
- 34 8. Teresa M. Sánchez and Norberto E. Vaccari. Ucumariidae new family (Bivalvia, Anomalodesmata) and other bivalves  
35 from the Early Ordovician (Tremadocian) of northwestern Argentina. *Ameghiniana*, 40(3):415–424, 2013.
- 36 9. Zong-Jie Fang, Jin-Hua Chen, Chu-Zhen Chen, Jin-Geng Sha, Xiu Lan, and Shi-Xuan Wen. Supraspecific taxa of the  
37 Bivalvia first named, described, and published in China (1927–2007). *University of Kansas Paleontological Contributions*  
38 *(new series)*, 17:1–157, 2009.
- 39 10. W I Ausich. Early phylogeny and subclass division of the crinoidea (phylum echinodermata). *Journal of Paleontology*, 72:  
40 499–510, 1998.
- 41 11. J C W Cope. Middle ordovician bivalves from mid-wales and the welsh borderland. *Palaeontology*, 42:467–499, 1999.
- 42 12. J J Sepkoski. A compendium of fossil marine animal genera. *Bulletins of American Paleontology*, 363(1):1–536, 2002.
- 43 13. R T Becker, S I Kaiser, and M Aretz. Paleozoic ammonoids in space and time. In N H Landman, T Kazushige, and R A  
44 Davis, editors, *Ammonoid Paleobiology*, pages 711–753. Plenum, 1996.
- 45 14. R T Becker, S I Kaiser, and M Aretz. Review of chrono-, litho- and biostratigraphy across the global hangenberg crisis and  
46 devonian–carboniferous boundary. In *Devonian Climate, Sea Level and Evolutionary Events*, pages 355–386. Geological  
47 Society of London Special Publications, 2016.
- 48 15. Marcin Machalski. Late Maastrichtian and earliest Danian scaphitid ammonites from central Europe: Taxonomy, evolution,  
49 and extinction. *Acta Palaeontologica Polonica*, 50(4):653–696, 2005. ISSN 05677920.
- 50 16. Neil H. Landman, Stijn Goolaerts, John W.M. Jagt, Elena A. Jagt-Yazykova, and Marcin Machalski. Ammonites on the  
51 Brink of Extinction: Diversity, Abundance, and Ecology of the Order Ammonoidea at the Cretaceous/Paleogene (K/Pg)  
52 Boundary. In Christian Klug, Dieter Korn, Kenneth de Baets, Isabelle Kruta, and Royal H. Mapes, editors, *Ammonoid*  
53 *Paleobiology: From macroevolution to paleogeography*, pages 497–553. Springer, 2015. .
- 54 17. Dieter Korn, Christian Klug, and Sonny A. Walton. Taxonomic diversity and morphological disparity of Paleozoic  
55 ammonoids. In Christian Klug, Dieter Korn, K. De Baets, I. Kruta, and R. H. Mapres, editors, *Ammonoid Paleobiology:*  
56 *From macroevolution to paleogeography*, pages 431–464. Springer, Dordrecht, 2015.
- 57 18. Andrzej Pisera. Echinoderms of the Mójcza Limestone. *Palaeontologia Polonica*, 53(1):283–307, 1994.
- 58 19. Shanan E. Peters. *Evenness, richness and the Cambrian–Paleozoic faunal transition in North America: an assemblage-level*  
59 *perspective*. PhD thesis, The University of Chicago, 2003.
- 60 20. Andrzej Kaim, Alexander L. Beisel, and Nikolai I. Kurushin. Mesozoic gastropods from Siberia and Timan (Russia). Part  
61 1: Vetigastropoda and Caenogastropoda (exclusive of Neogastropoda). *Polish Polar Research*, 25(3-4):241–266, 2004.  
62 ISSN 01380338.
- 63 21. Alexander Nützel, Andrzej Kaim, and Eugen Grădinaru. Middle Triassic (Anisian, Bithynian) gastropods from North  
64 Dobrogea (Romania) and their significance for gastropod recovery from the end-Permian mass extinction event. *Papers in*  
65 *Palaeontology*, 4(4):477–512, 2018. ISSN 20562802. .
- 66 22. P Copper. Originations and extinctions in brachiopods. *Paleontological Society Papers*, 7:249–258, 2001.
- 67 23. R. M. Owens. Carboniferous trilobites: the beginning of the end. *Geology Today*, 6(3):96–100, 1990. ISSN 13652451. .
- 68 24. James C. Lamsdell and Paul A. Selden. Phylogenetic support for the monophyly of proetide trilobites. *Lethaia*, 48(3):  
69 375–386, 2015. ISSN 15023931. .
- 70 25. Dorothy Hill. Rugosa and Tabulata. In C. Teichert, editor, *Treatise on Invertebrate Paleontology, Part F, Coelenterata,*  
71 *Supplement 1*, pages xi+762. Geological Society of America and University of Kansas Press, Boulder, CO and Lawrence,  
72 Kansas, 1981.
- 73 26. R C Moore. Geological Society of America and University of Kansas Press, Boulder, CO and Lawrence, Kansas, 1956.
- 74 27. Hans Hess and Charles G. Messing. *Treatise on Invertebrate Paleontology, Part T, Echinodermata 2 (Revised), Crinoidea,*  
75 *Vol. 3*. The University of Kansas Press, Lawrence, Kansas, 2011.



- 76 28. Feng-Sheng Xia, Sen-Gui Zhang, and Zong-Zhe Wang. The Oldest Bryozoans: New Evidence From the Late Tremadocian  
77 (Early Ordovician) of East Yangtze Gorges in China. *Journal of Paleontology*, 2007. ISSN 0022-3360. .
- 78 29. E. H. Gilmour and R. C. Walker. Bryozoans from the Phosphoria Formation (Permian), southeastern Idaho (USA).  
79 *Contributions to Geology - University of Wyoming, Laramie*, 24(2):191–209, 1986.
- 80 30. Mike Reich. *Linguaserra spandeli* sp. nov. (Echinodermata: Ophiocystioidea) from the Late Permian (Zechstein) of  
81 Thuringia, Germany. *Annales de Paleontologie*, 93(4):317–330, 2007. ISSN 07533969. .
- 82 31. L Angiolini. Quantitative palaeoecology in the pachycyrtella bed, early permian of interior oman. *Palaeoworld*, 16:233–245,  
83 2007.
- 84 32. Jiří Frýda and Doris Heidelberger. Systematic position of Cyrtoneritimorpha within the class Gastropoda with description  
85 of two new genera from Siluro-Devonian strata of Central Europe. *Bulletin of Geosciences*, 78(1):35–39, 2003.
- 86 33. Catherine M. Powers and Joseph F. Pachut. Diversity and distribution of Triassic bryozoans in the aftermath of the  
87 end-Permian mass extinction. *Journal of Paleontology*, 82(2):362–371, 2008. ISSN 0022-3360. .
- 88 34. W. M. Furnish, B. F. Glenister, J. Kullmann, and Zhou Zuren. Carboniferous and Permian Ammonoidea (Goniatitida  
89 and Prolecanitida). In Paul A. Selden, editor, *Treatise on Invertebrate Paleontology, Part L, Mollusca 4 (Revised), Vol. 2*,  
90 pages 125–135. Geological Society of America and University of Kansas Press, Boulder, CO and Lawrence, Kansas, 2009.
- 91 35. A. Nowinski. Tabulate corals from the Givetian and Frasnian of the Holy Cross Mountains and Silesian Upland. *Acta*  
92 *Palaeontologica Polonica*, 37(2-4):183–216, 1993. ISSN 05677920.
- 93 36. W I Ausich, A A Sá, and J C Gutieérrez-Marco. New and revised occurrences of ordovician crinoids from southwestern  
94 europe. *Journal of Paleontology*, 81:1374–1383, 2007.
- 95 37. S Bengtson. The lower cambrian fossil tomotia. *Lethaia*, 3:222–256, 1970.
- 96 38. Sonia Ros and Javier Echevarría. Bivalves and evolutionary resilience: Old skills and new strategies to recover from the  
97 P/T and T/J extinction events. *Historical Biology*, 23(4):411–429, 2011. ISSN 08912963. .
- 98 39. M. K. Howarth and N. J. Morris. The Jurassic and Lower Cretaceous of Wadi Hajar, southern Yemen. *Bulletin of the*  
99 *Natural History Museum, Geology series*, 54:1–32, 1998.
- 100 40. S K Donovan, G D Webster, and J A Waters. A last peak in diversity: the stalked echinoderms of the permian of timor.  
101 *Geology Today*, 32:179–185, 2016.
- 102 41. Rudy Lerosey-Aubril and Raimund Feist. Quantitative Approach to Diversity and Decline in Late Palaeozoic Trilobites. In  
103 *Earth and Life: Global Biodiversity, Extinction Intervals and Biogeographic Perturbations Through Time*, pages 535–555.  
104 2012. ISBN 9789048134281. .
- 105 42. Raimund Feist and Kenneth J. McNamara. Biodiversity, distribution and patterns of extinction of the last odontopleuroid  
106 trilobites during the devonian (givetian, frasnian). *Geological Magazine*, 144(5):777–796, 2007.
- 107 43. P Copper. Evaluating the frasnian-famennian mass extinction: comparing brachiopod faunas. *Acta Palaeontologica*  
108 *Polonica*, 43:137–154, 1998.
- 109 44. Z Q Deng. Middle triassic corals from w. guangxi and s. guizhou. *Acta Palaeontologica Sinica*, 45:32–51, 2006.
- 110 45. K J McNamara and R Feist. Patterns of trilobite evolution and extinction during the Frasnian/Famennian mass extinction,  
111 Canning Basin, Western Australia. *Cuadernos del Museo Geominero, n°9*, Advances i:269–274, 2008.
- 112 46. Mike Foote. Morphological diversification of Paleozoic crinoids. *Paleobiology*, 21(3):273–299, 1995.
- 113 47. Gary D. Webster, Daniel J. Hafley, Daniel B. Blake, and Alexander Glass. Crinoids and stelleroids (Echinodermata) from  
114 the Broken Rib Member, Dyer Formation (Late Devonian, Famennian) of the White River Plateau, Colorado. *Journal of*  
115 *Paleontology*, 73(3):461–486, 1999. ISSN 00223360. .
- 116 48. Jing Chen, Jinnan Tong, Haijun Song, Mao Luo, Yunfei Huang, and Ye Xiang. Recovery pattern of brachiopods after the  
117 permian–triassic crisis in south china. *Palaeogeography Palaeoclimatology Palaeoecology*, 433:91–2015, 2015.
- 118 49. Richard A. Fortey and Robert M. Owens. Proetida - a new order of trilobites. *Fossils and Strata*, (4):227–239, 1975.
- 119 50. Alistair J. McGowan. The effect of the Permo-Triassic bottleneck on Triassic ammonoid morphological evolution.  
120 *Paleobiology*, 30(3):369–395, 2004. ISSN 0094-8373. .
- 121 51. Alistair J. McGowan and Andrew B. Smith. Ammonoids across the Permian/Triassic boundary: A cladistic perspective.  
122 *Palaeontology*, 50(3):573–590, 2007. ISSN 00310239. .
- 123 52. T. Guensburg and J. Sprinkle. The oldest known crinoids and a new look at crinoid origins. *American Paleontology*, 11(3):  
124 3–5, 2003.
- 125 53. Shu Zhong Shen, Hua Zhang, Wen Zhong Li, Lin Mu, and Jun Fang Xie. Brachiopod diversity patterns from Carboniferous  
126 to Triassic in South China. *Geological Journal*, 41(3-4):345–361, 2006. ISSN 00721050. .
- 127 54. Xiaojuan Wang, Xiangdong Wang, Yichun Zhang, Changqun Cao, and Dongjin Lee. Late Permian rugose corals from  
128 Gyanyima of Drhada, Tibet (Xizang), Southwest China. *Journal of Paleontology*, 93(5):856–875, 2019. ISSN 00223360. .
- 129 55. L R M Cocks and J-Y Rong. Strophomenida. In A Williams, C H C Brunton, and S J Carlson, editors, *Treatise on*  
130 *Invertebrate Paleontology, Part H (Revised), Brachiopoda, Vol. 6: Supplement*, pages 2598–2627. Geological Society of  
131 America and University of Kansas Press, 2007.
- 132 56. Margaret Fuller and Richard Jenkins. Reef corals from the lower Cambrian of the flinders ranges, South Australia.  
133 *Palaeontology*, 50(4):961–980, 2007. ISSN 00310239.
- 134 57. N. V. Novozhilova, M. Steiner, I. V. Korovnikov, and D. A. Tokarev. Early Cambrian Tommotiids of Khairkhan Section  
135 (Central Tyva). *Paleontological Journal*, 53(6):575–582, 2019. ISSN 15556174. .
- 136 58. Xiao Chen Huang, Jin Hui Su, Jie Xiu Ouyang, Shan Ouyang, Chun Hua Zhou, and Xiao Ping Wu. Towards a global

137 phylogeny of freshwater mussels (Bivalvia: Unionida): Species delimitation of Chinese taxa, mitochondrial phylogenomics,  
138 and diversification patterns. *Molecular Phylogenetics and Evolution*, 130(April 2018):45–59, 2019. ISSN 10959513. . URL  
139 <https://doi.org/10.1016/j.ympev.2018.09.019>.
